# Supplementary material for: Synthesis and evaluation of new chromene based [1,8]naphthyridines derivatives as potential antimicrobial agents
Source: Royal Society of Chemistry journal article supplement (doi:10.1039/c6ra15754h), 2016-01-01
Supplement: c6ra15754h1.pdf [file c6ra15754h1.pdf]

## Supplementary Material

### Synthesis and evaluation of new chromene based [1,8]naphthyridines derivatives as potential antimicrobial agents

Jayvirsinh D. Gohil, Haresh B. Patel, Manish P. Patel\*

Department of Chemistry, Sardar Patel University, Vallabh Vidyanagar, Gujarat, India

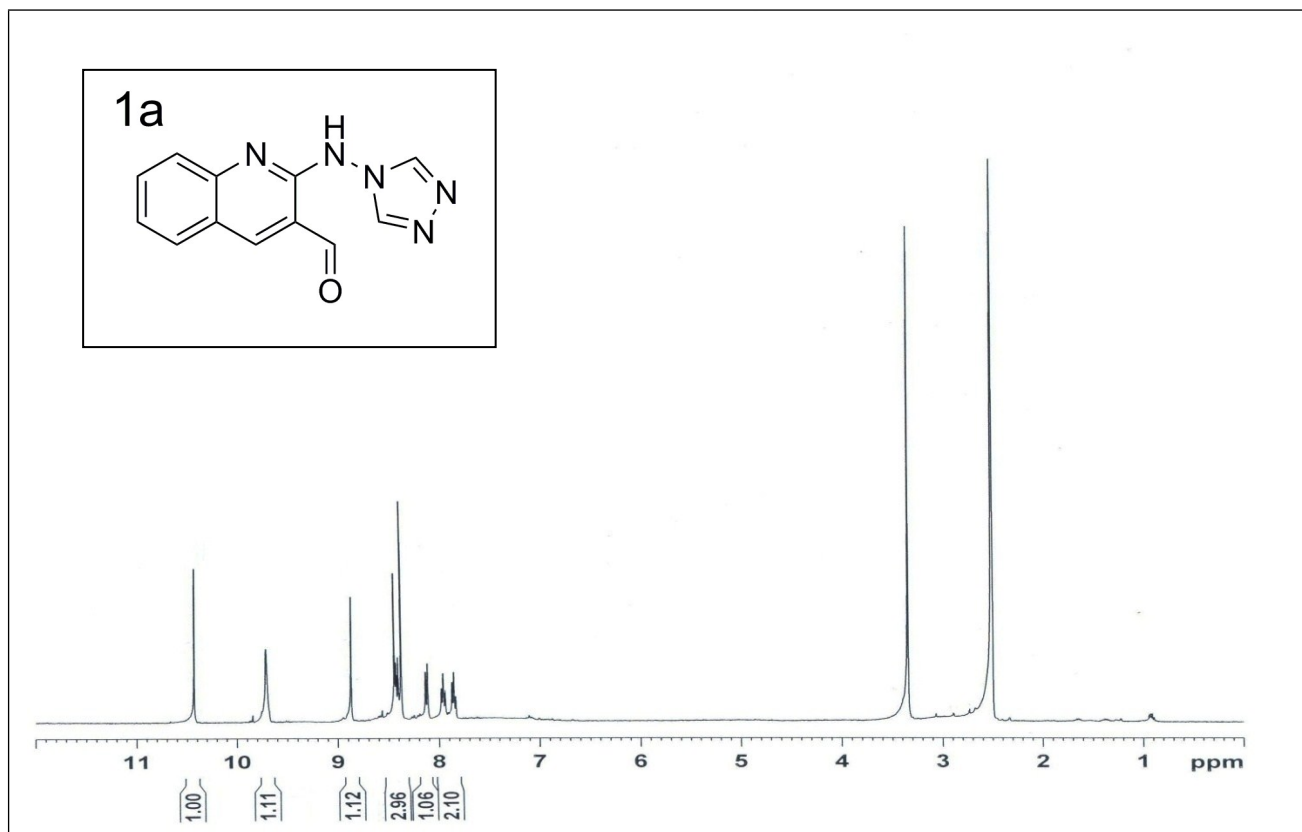

1a

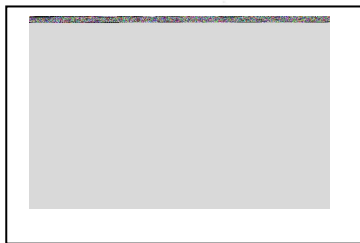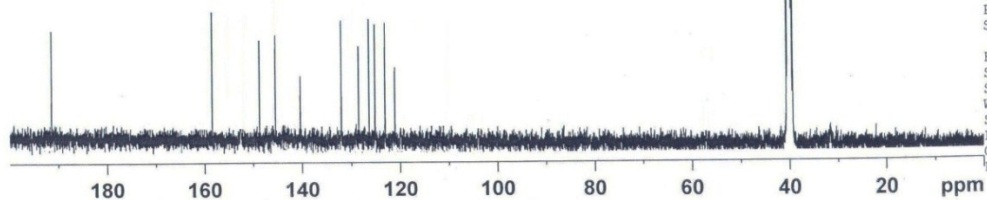

```
Current Data Parameters
NAME      MPP
EXPNO    120
PROCNO   1

F2 - Acquisition Parameters
Date_    20140427
Time_    12.19
INSTRUM  spect
PROBHD   5 mm BBO BB-1H
PULPROG  zgpg30
TD       65536
SOLVENT  DMSO
NS       1024
DS       4
SWH      23980.814 Hz
FIDRES   0.365918 Hz
AQ       1.3664756 sec
RG       8192
DW       20.850 usec
DE       6.00 usec
TE       298.6 K
D1       2.00000000 sec
d11      0.03000000 sec
DELTA    1.89999998 sec
TD0      1

===== CHANNEL f1 =====
NUC1     13C
P1       14.00 usec
PL1      -4.00 dB
SFO1     100.6228298 MHz

===== CHANNEL f2 =====
CPDPRG2  waltz16
NUC2     1H
PCPD2    80.00 usec
PL2      -1.00 dB
PL12     14.46 dB
PL13     15.00 dB
SFO2     400.1316005 MHz

F2 - Processing parameters
SI       32768
SF       100.6127690 MHz
WDW      EM
SSB      0
LB       1.00 Hz
GB       0
PC       1.40
```

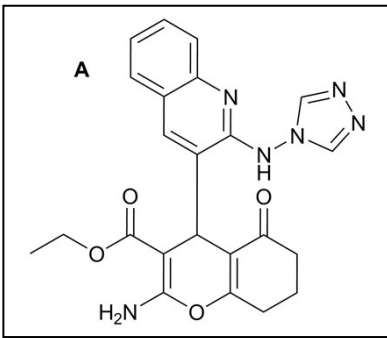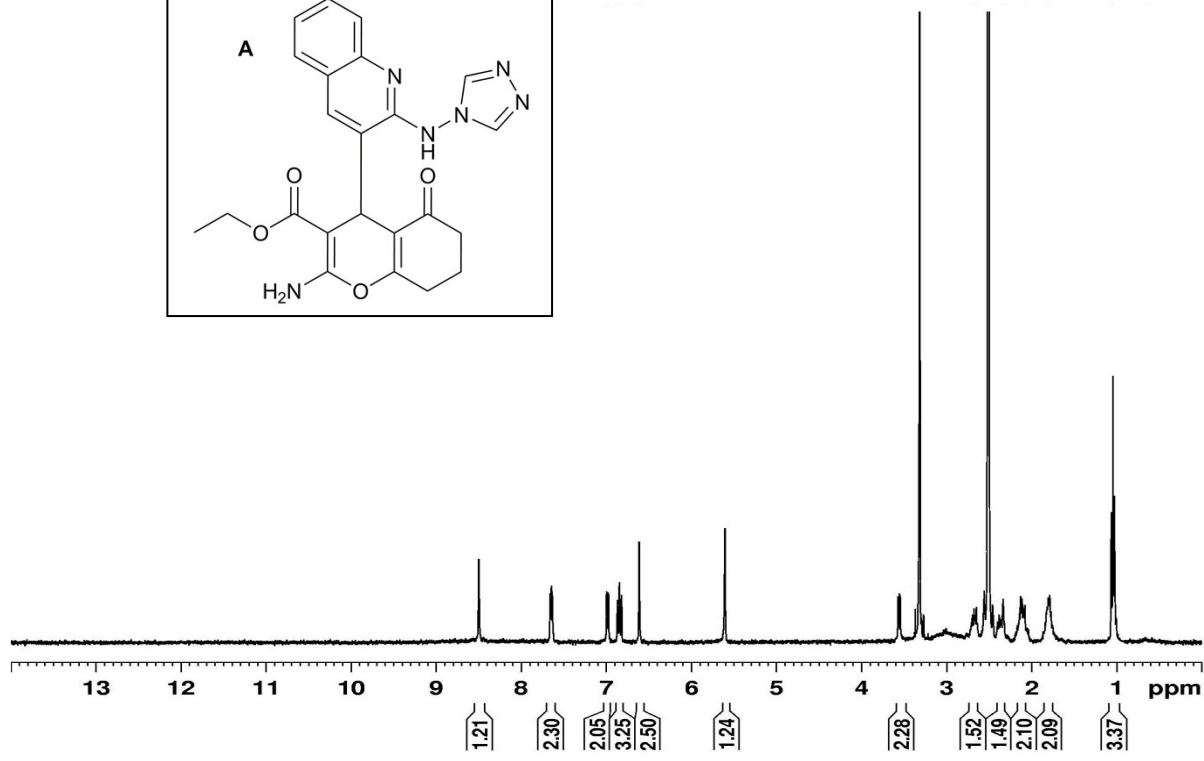

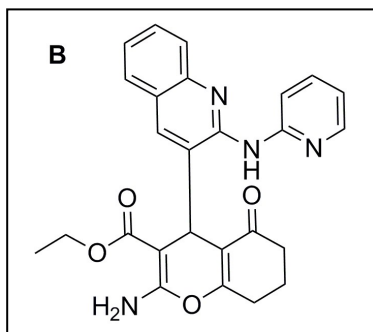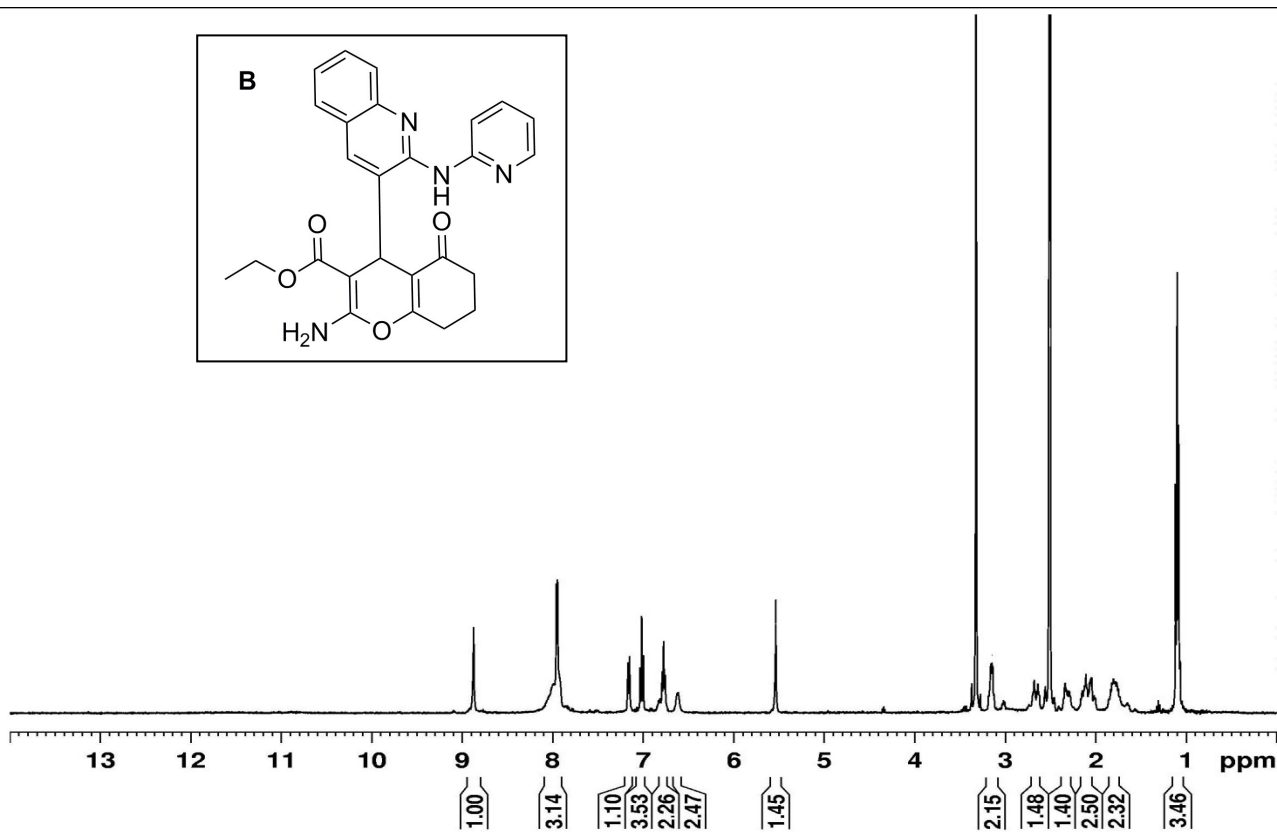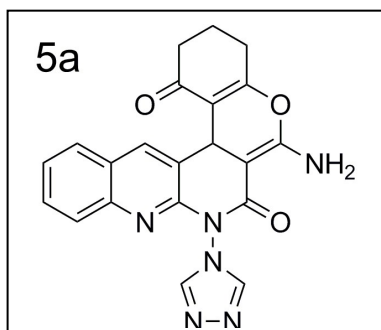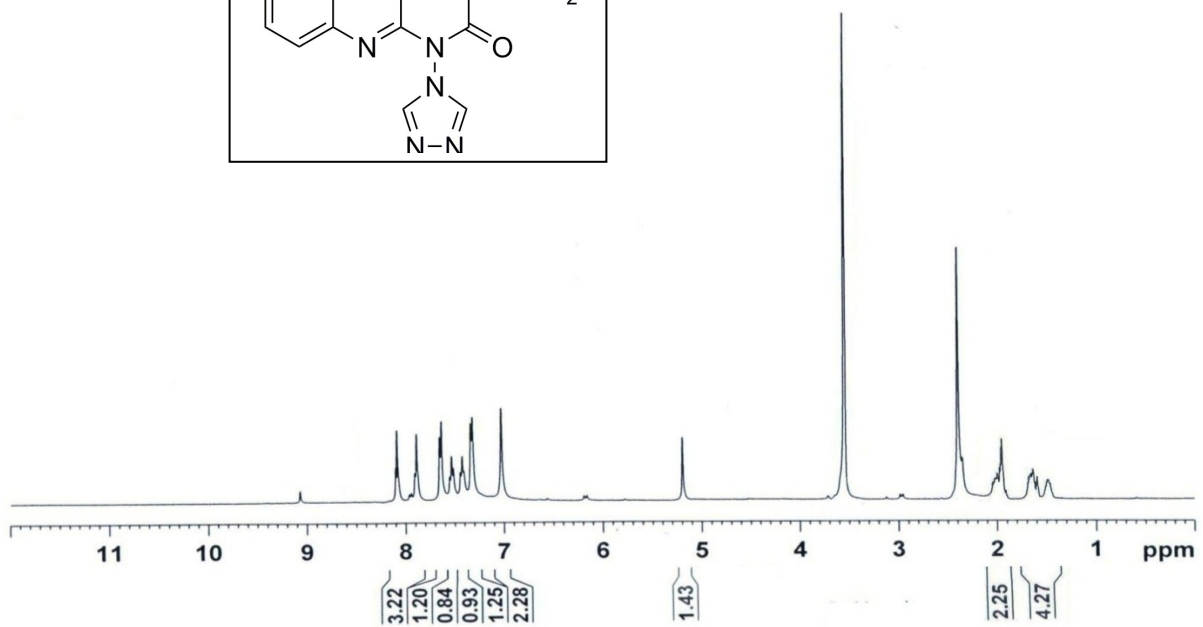

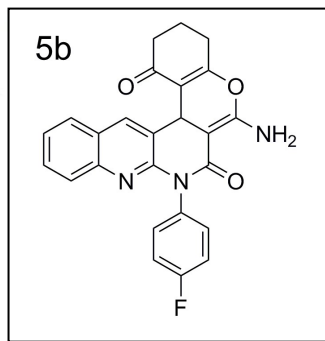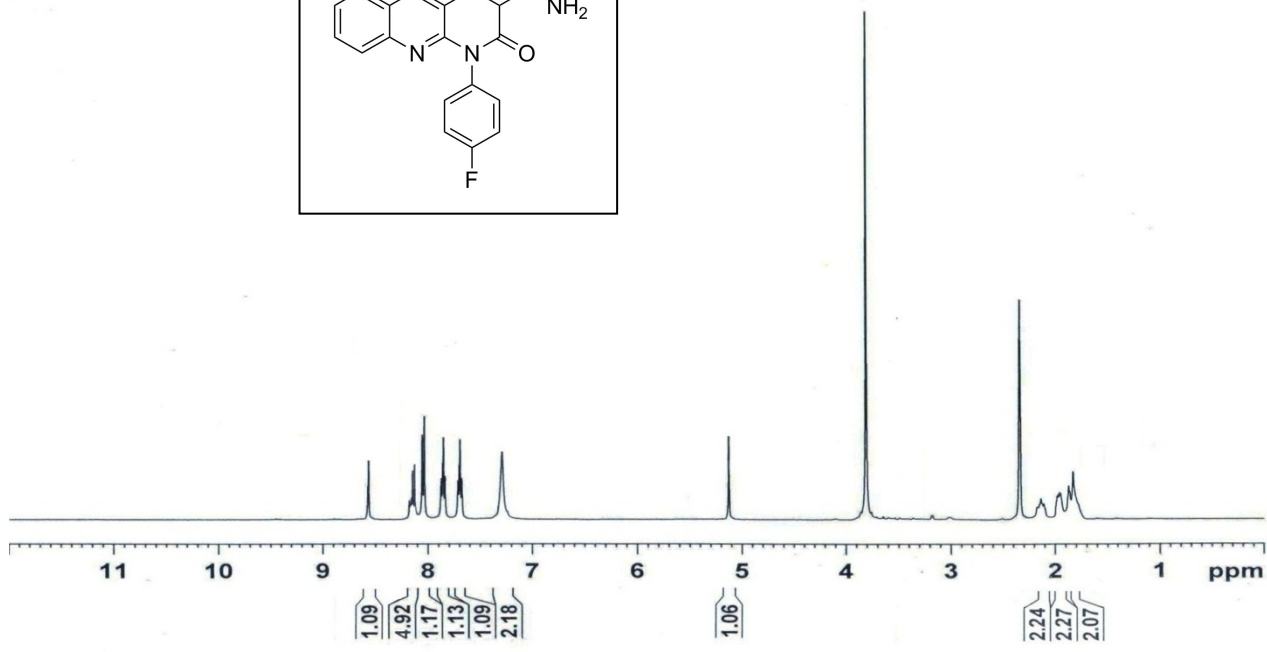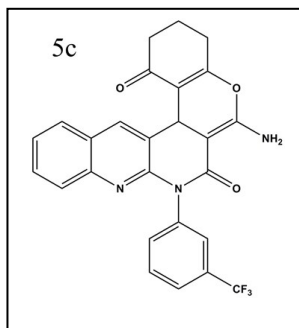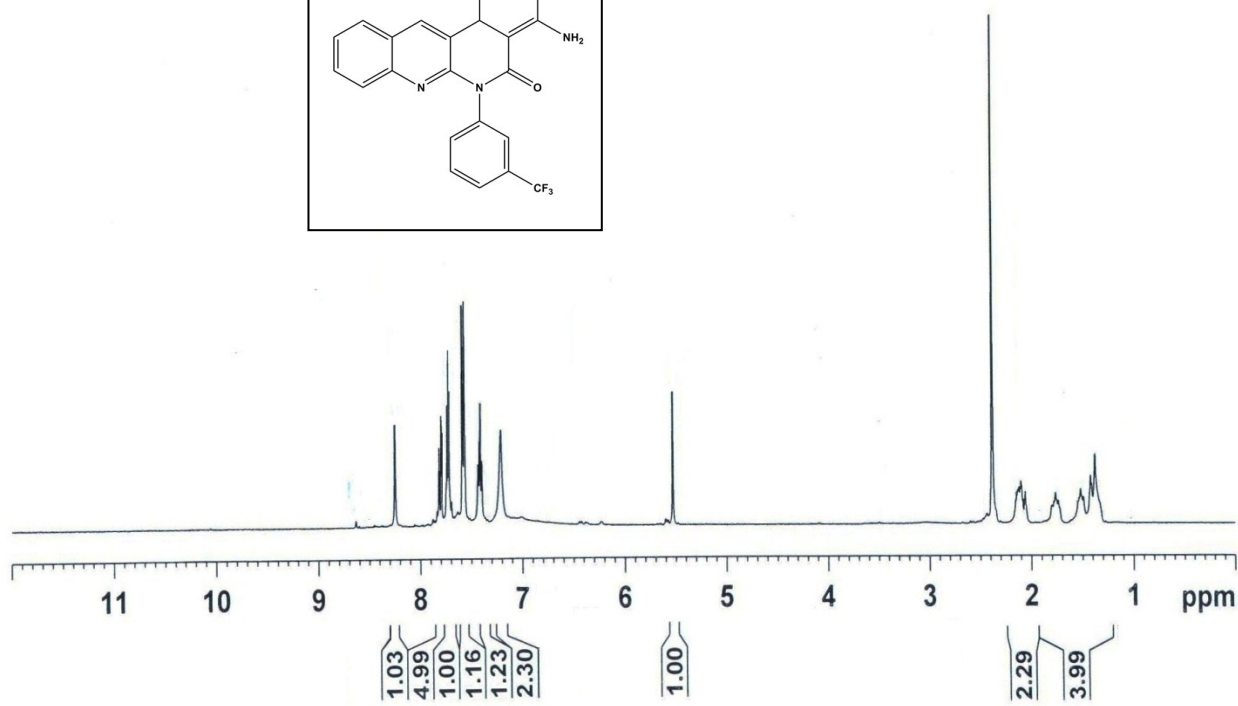

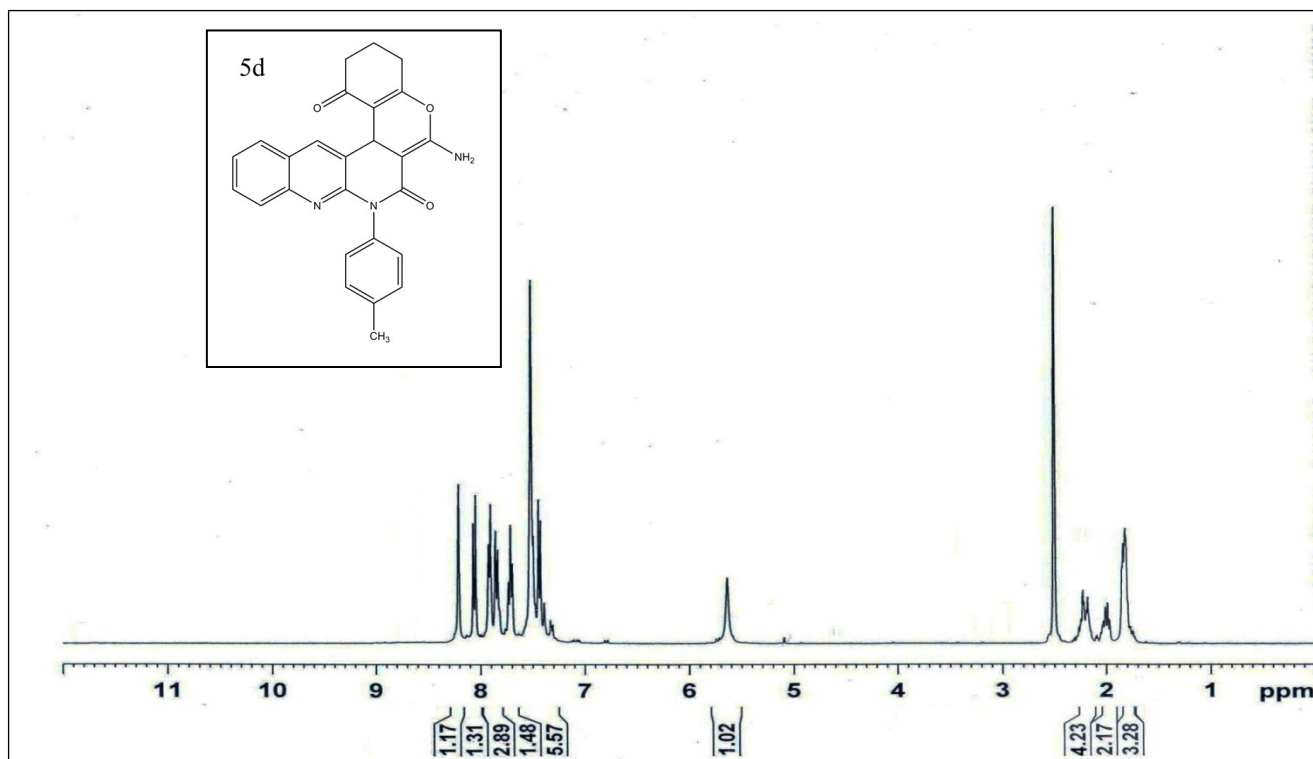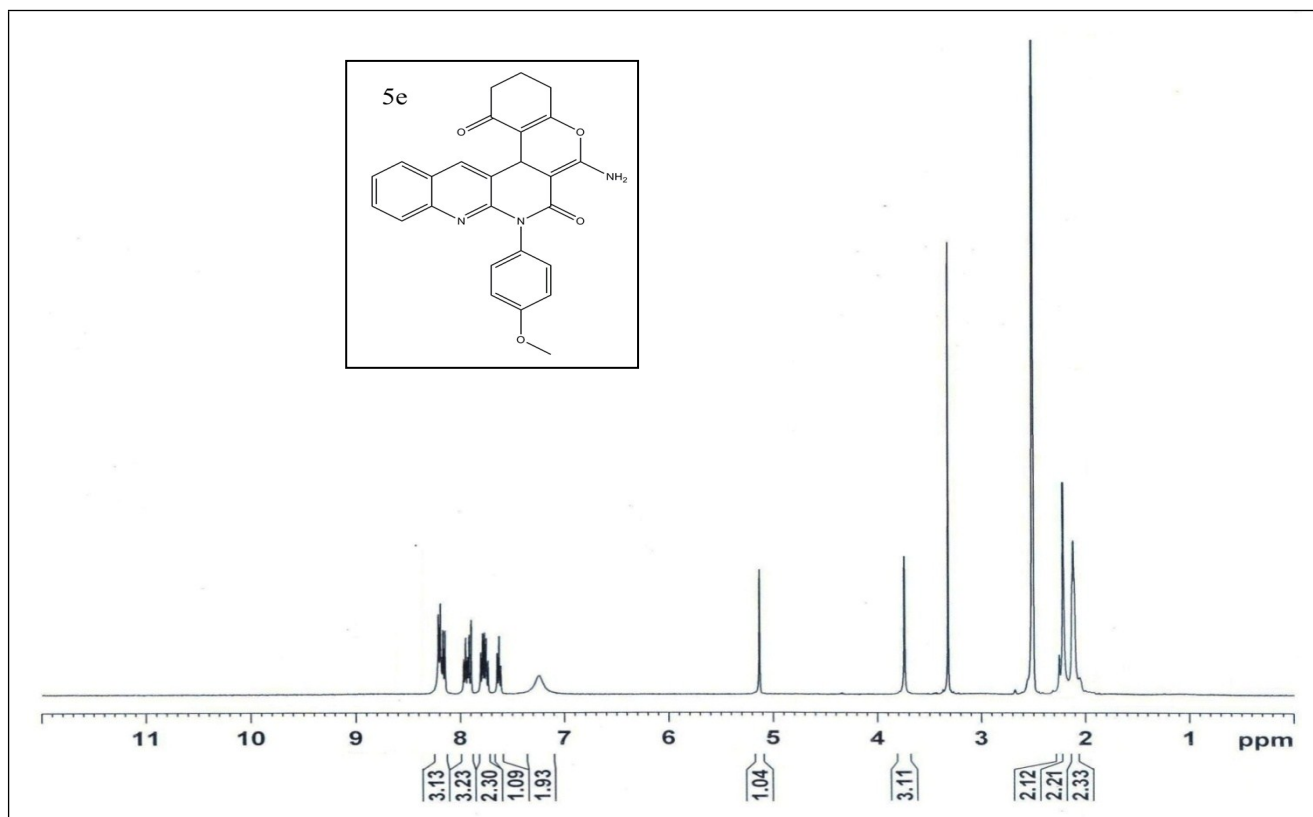

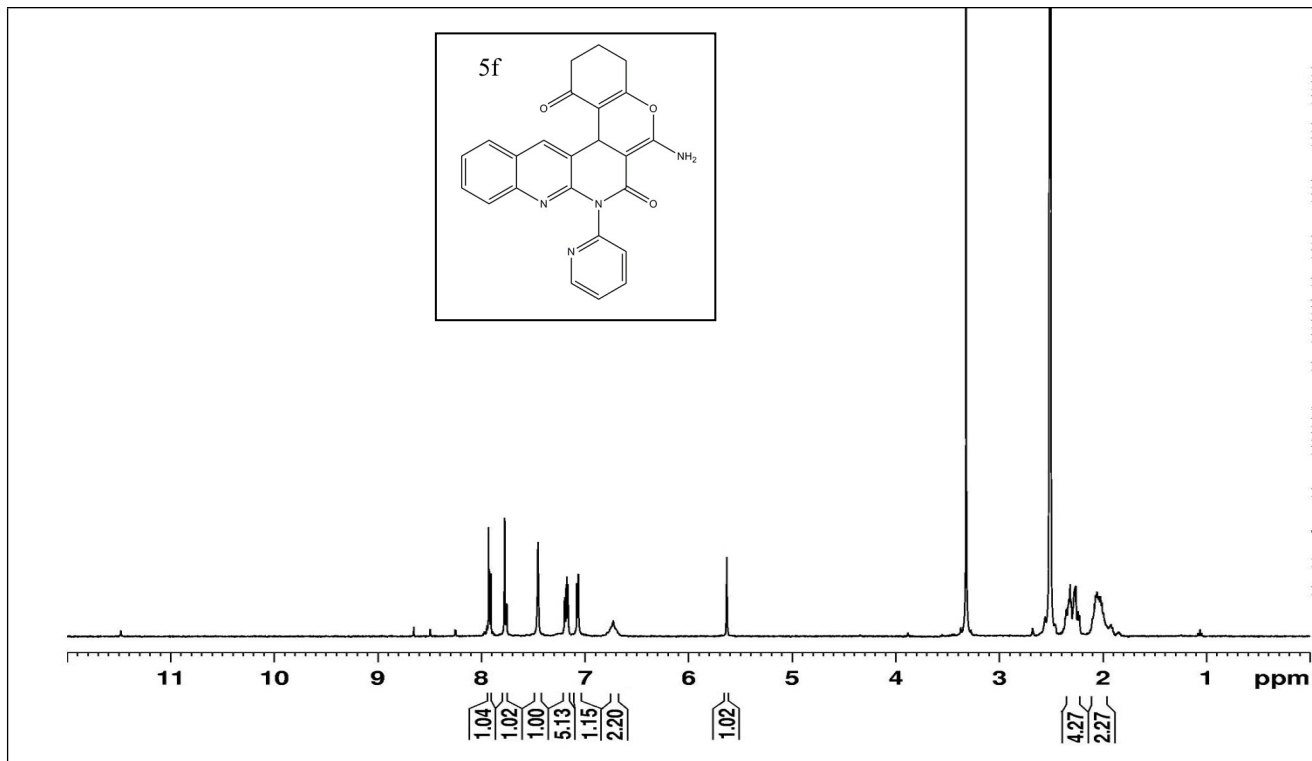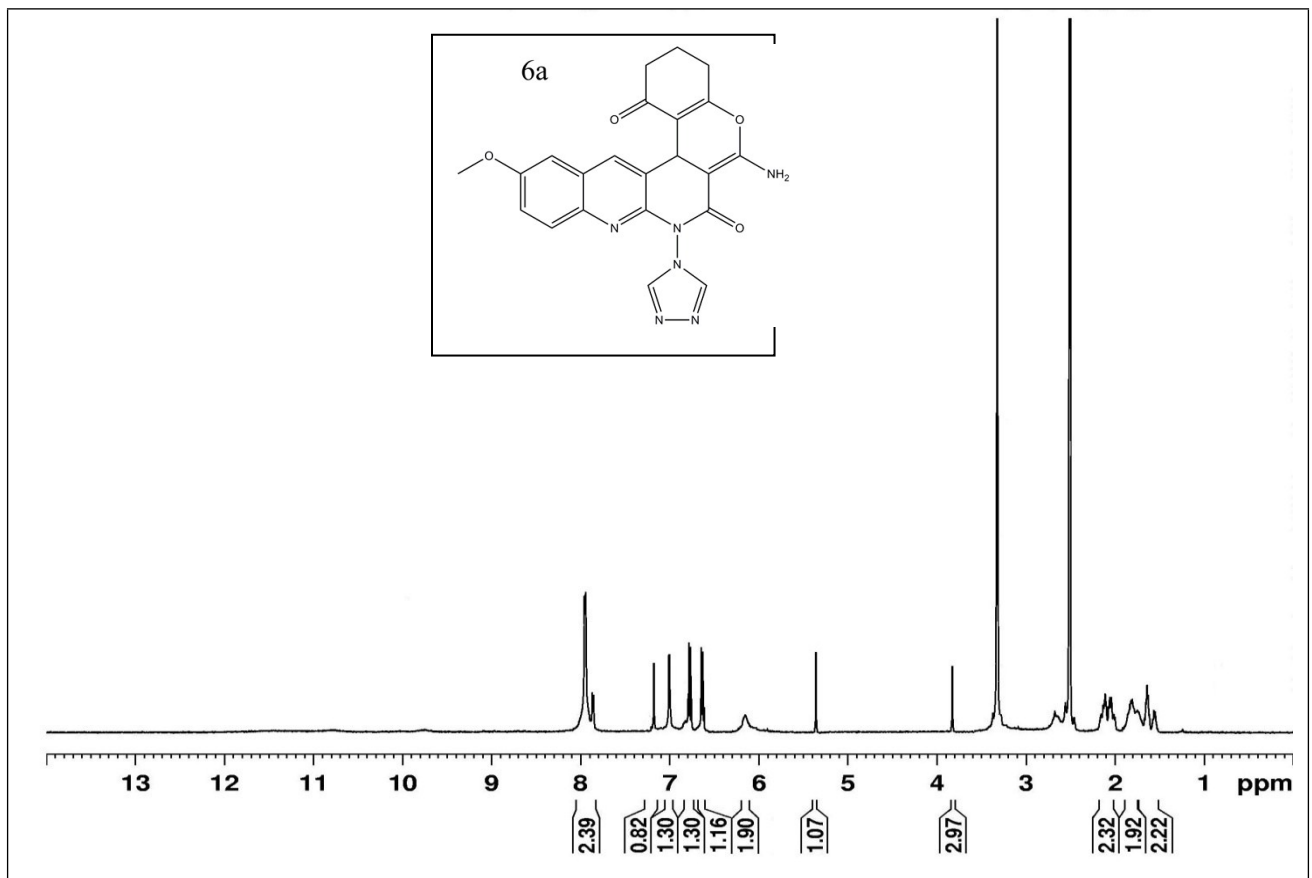

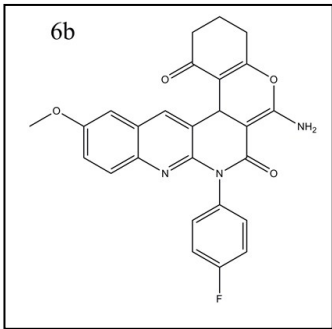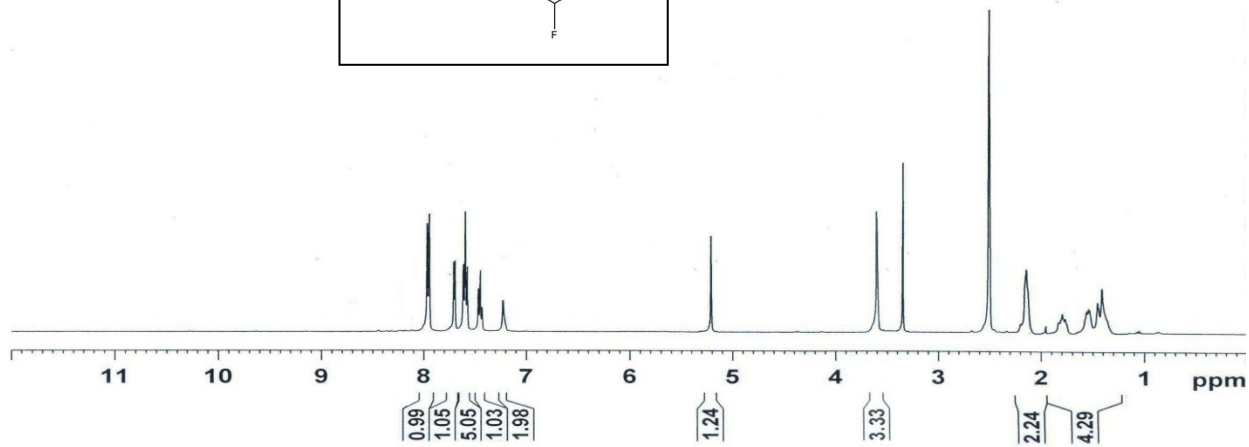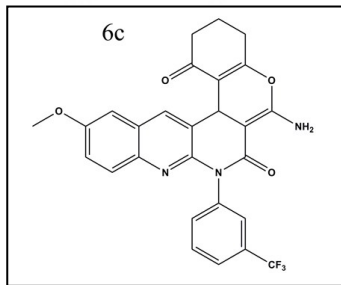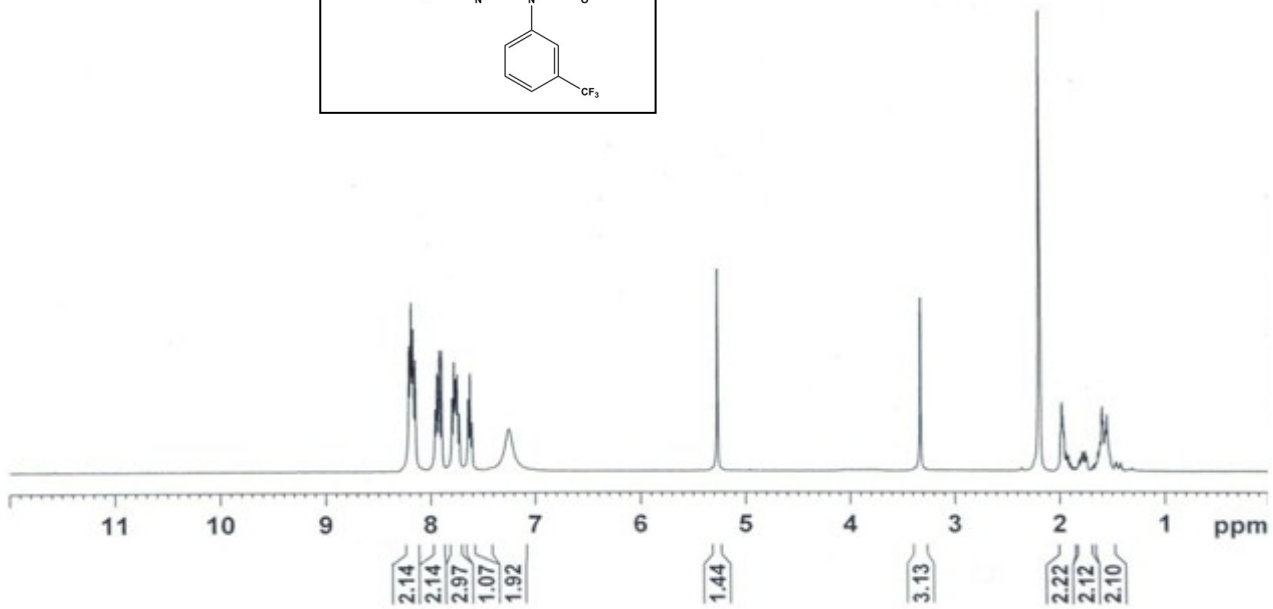

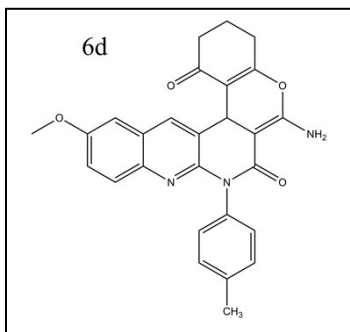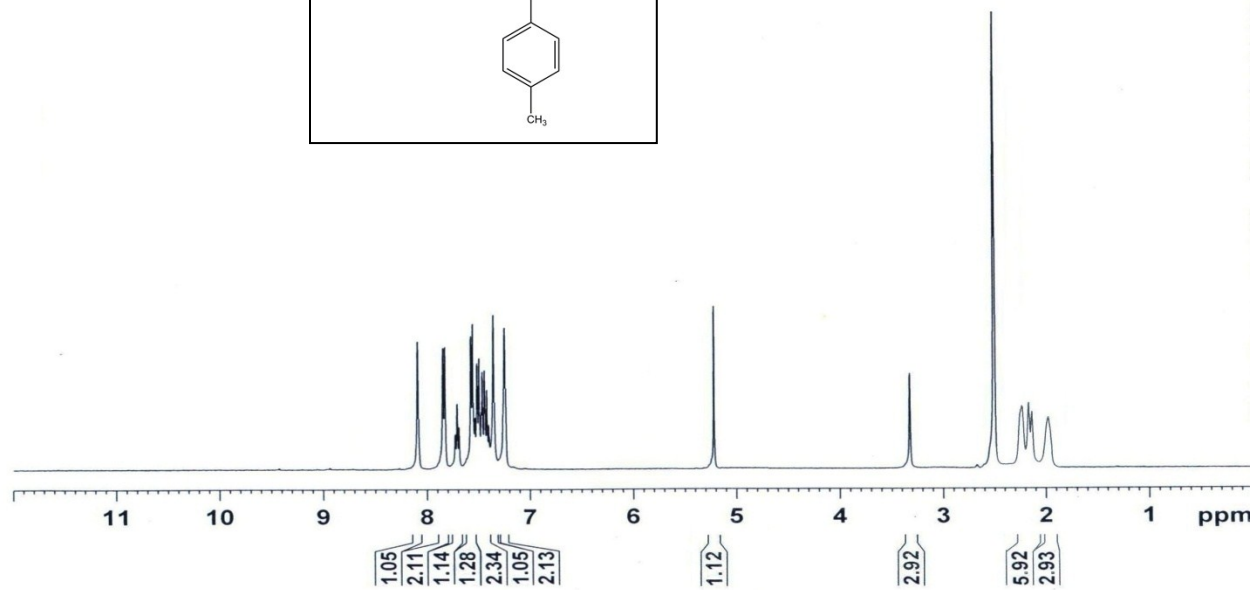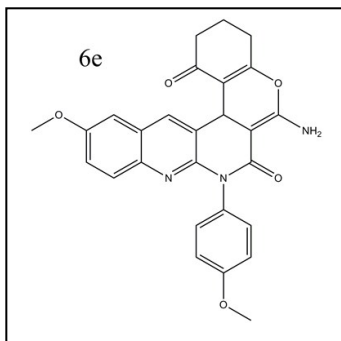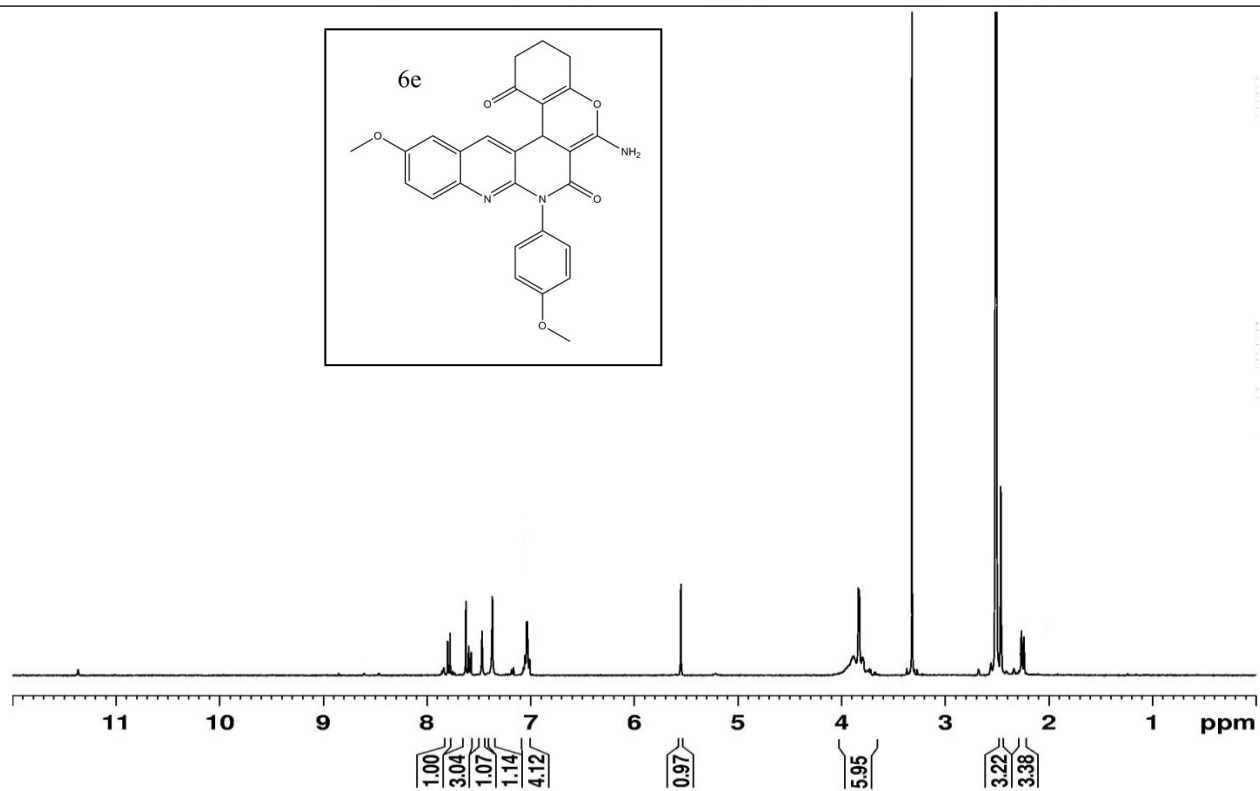



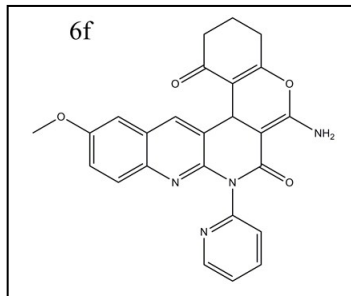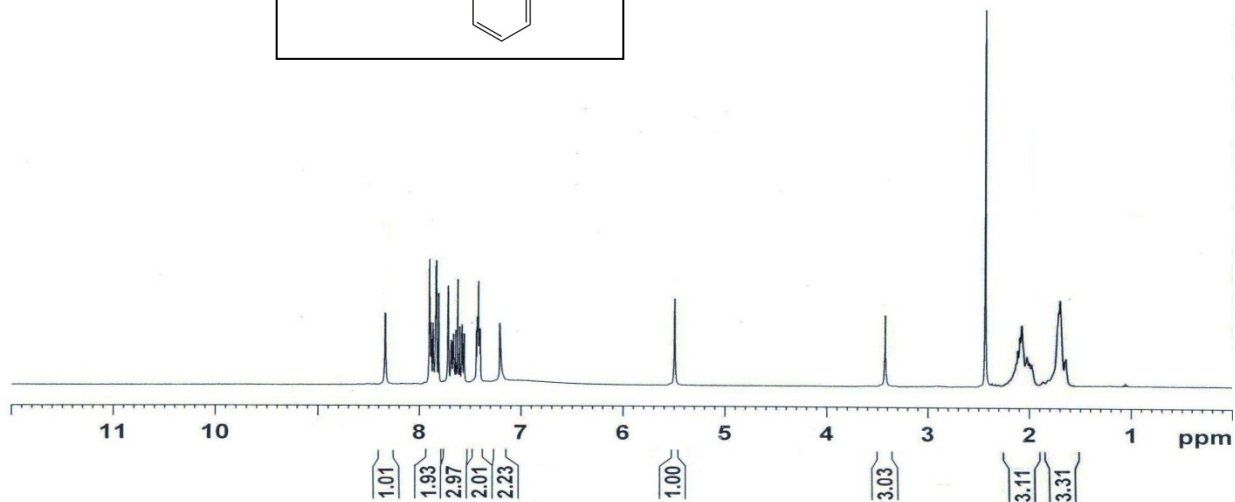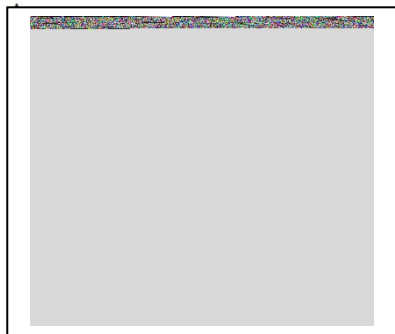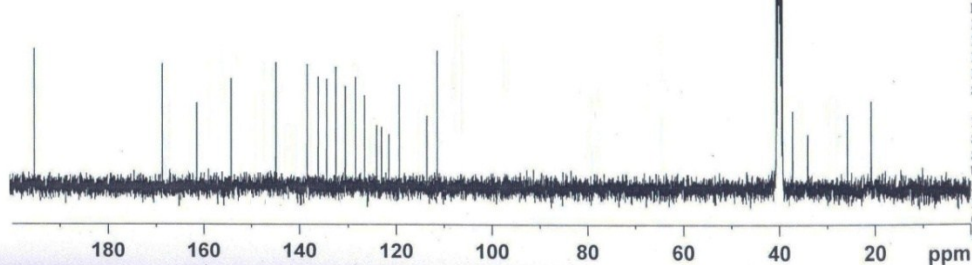

Current Data Parameters  
 NAME MPP  
 EXPNO 121  
 PROCNO 1

F2 - Acquisition Parameters  
 Date 20140827  
 Time 13.47  
 INSTRUM spect  
 PROBHD 5 mm BBO BB-1H  
 PULPROG zgpg30  
 TD 65536  
 SOLVENT DMSO  
 NS 1024  
 DS 4  
 SWH 23980.814 Hz  
 FIDRES 0.365918 Hz  
 AQ 1.3664756 sec  
 RG 8192  
 DW 20.850 usec  
 DE 6.00 usec  
 TE 298.7 K  
 D1 2.0000000 sec  
 d11 0.0300000 sec  
 DELTA 1.89999998 sec  
 TD0 1

===== CHANNEL f1 =====  
 NUC1 13C  
 P1 14.00 usec  
 PL1 -4.00 dB  
 SFO1 100.6228298 MHz

===== CHANNEL f2 =====  
 CPDPRG2 waltz16  
 NUC2 1H  
 PCPD2 80.00 usec  
 PL2 -1.00 dB  
 PL12 14.46 dB  
 PL13 15.00 dB  
 SFO2 400.1316005 MHz

F2 - Processing parameters  
 SI 32768  
 SF 100.6127690 MHz  
 WDW EM  
 SSB 0  
 LB 1.00 Hz  
 GB 0  
 PC 1.40

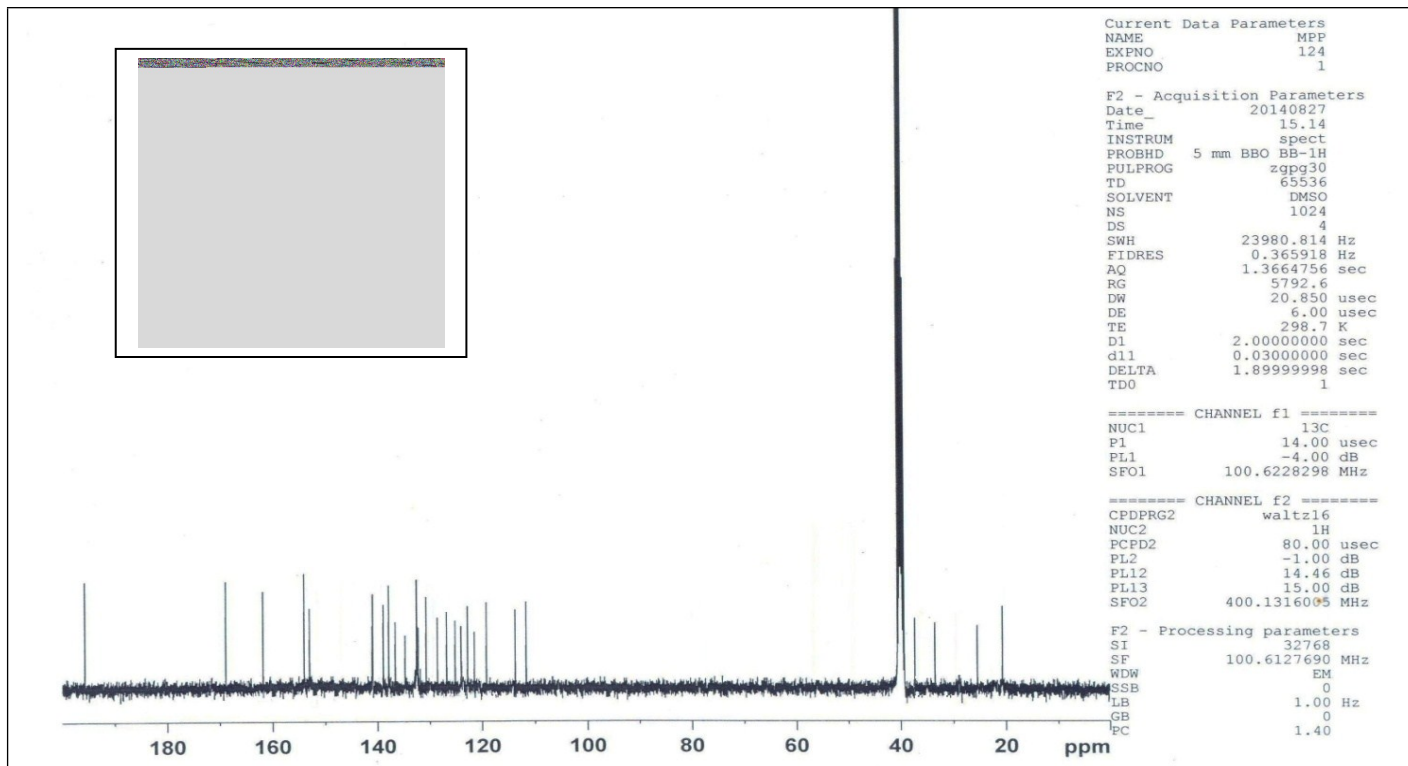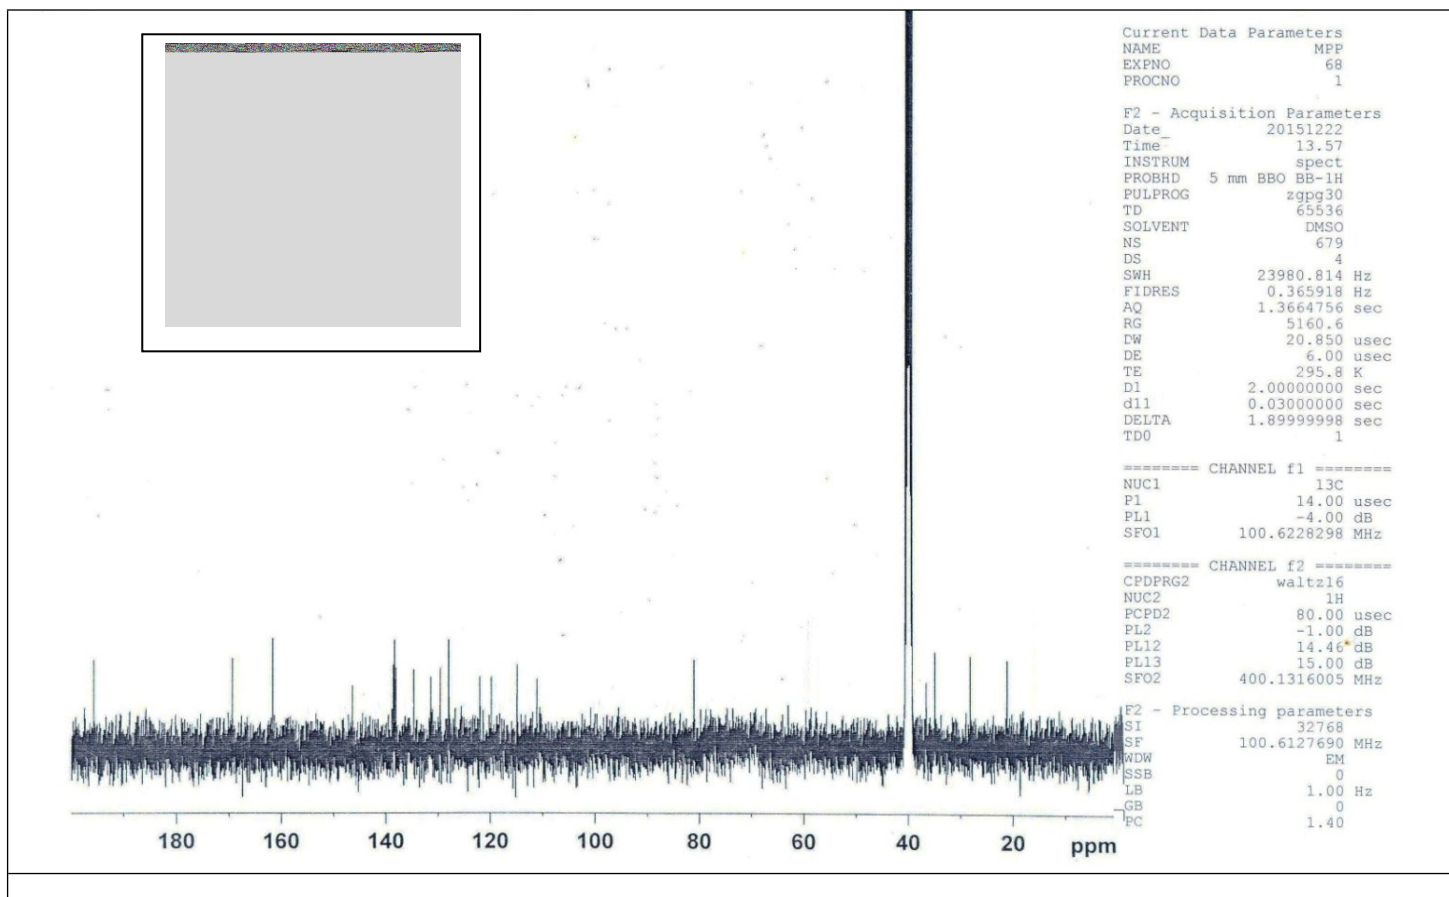

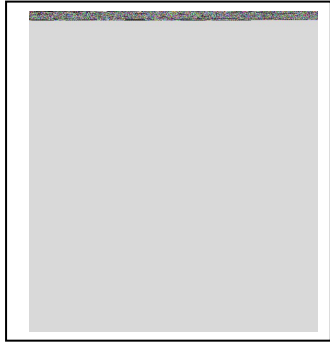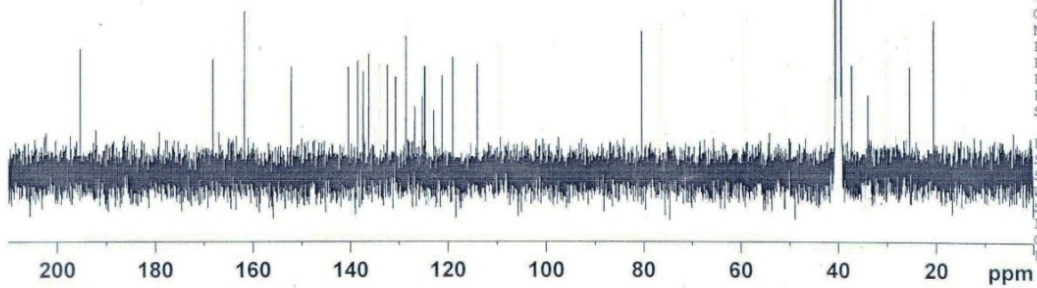

Current Data Parameters  
NAME MPP  
EXPNO 78  
PROCNO 1  
  
F2 - Acquisition Parameters  
Date 20151222  
Time 13.77  
INSTRUM spect  
PROBHD 5 mm BBO BB-1H  
PULPROG zgpg30  
TD 65536  
SOLVENT DMSO  
NS 679  
DS 4  
SWH 23980.814 Hz  
FIDRES 0.365918 Hz  
AQ 1.3664756 sec  
RG 5160.6  
DW 20.850 usec  
DE 6.00 usec  
TE 295.8 K  
D1 2.00000000 sec  
d11 0.03000000 sec  
DELTA 1.89999998 sec  
TD0 1

===== CHANNEL f1 =====  
NUC1 13C  
P1 14.00 usec  
PL1 -4.00 dB  
SFO1 100.6228298 MHz

===== CHANNEL f2 =====  
CPDPRG2 waltz16  
NUC2 1H  
PCPD2 80.00 usec  
PL2 -1.00 dB  
PL12 14.46 dB  
PL13 15.00 dB  
SFO2 400.1316005 MHz

F2 - Processing parameters  
SI 32768  
SF 100.6127690 MHz  
WDW EM  
SSB 0  
LB 1.00 Hz  
GB 0  
PC 1.40

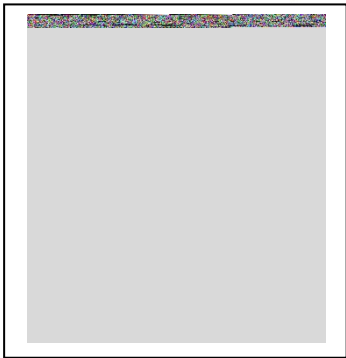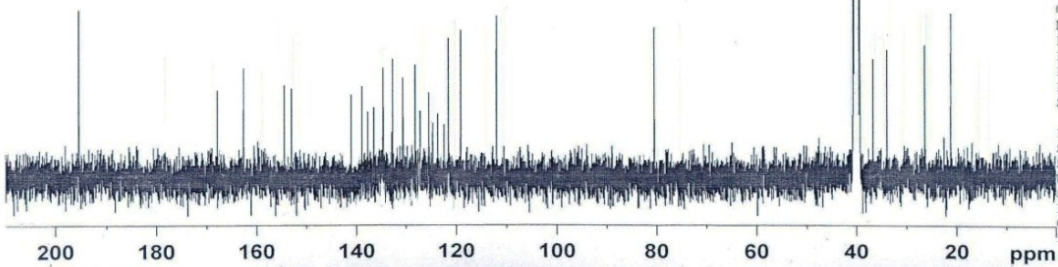

Current Data Parameters  
NAME MPP  
EXPNO 66  
PROCNO 1  
  
F2 - Acquisition Parameters  
Date 20151221  
Time 16.16  
INSTRUM spect  
PROBHD 5 mm BBO BB-1H  
PULPROG zgpg30  
TD 65536  
SOLVENT DMSO  
NS 1024  
DS 4  
SWH 23980.814 Hz  
FIDRES 0.365918 Hz  
AQ 1.3664756 sec  
RG 4096  
DW 20.850 usec  
DE 6.00 usec  
TE 295.3 K  
D1 2.00000000 sec  
d11 0.03000000 sec  
DELTA 1.89999998 sec  
TD0 1

===== CHANNEL f1 =====  
NUC1 13C  
P1 14.00 usec  
PL1 -4.00 dB  
SFO1 100.6228298 MHz

===== CHANNEL f2 =====  
CPDPRG2 waltz16  
NUC2 1H  
PCPD2 80.00 usec  
PL2 -1.00 dB  
PL12 14.46 dB  
PL13 15.00 dB  
SFO2 400.1316005 MHz

F2 - Processing parameters  
SI 32768  
SF 100.6127690 MHz  
WDW EM  
SSB 0  
LB 1.00 Hz  
GB 0  
PC 1.40

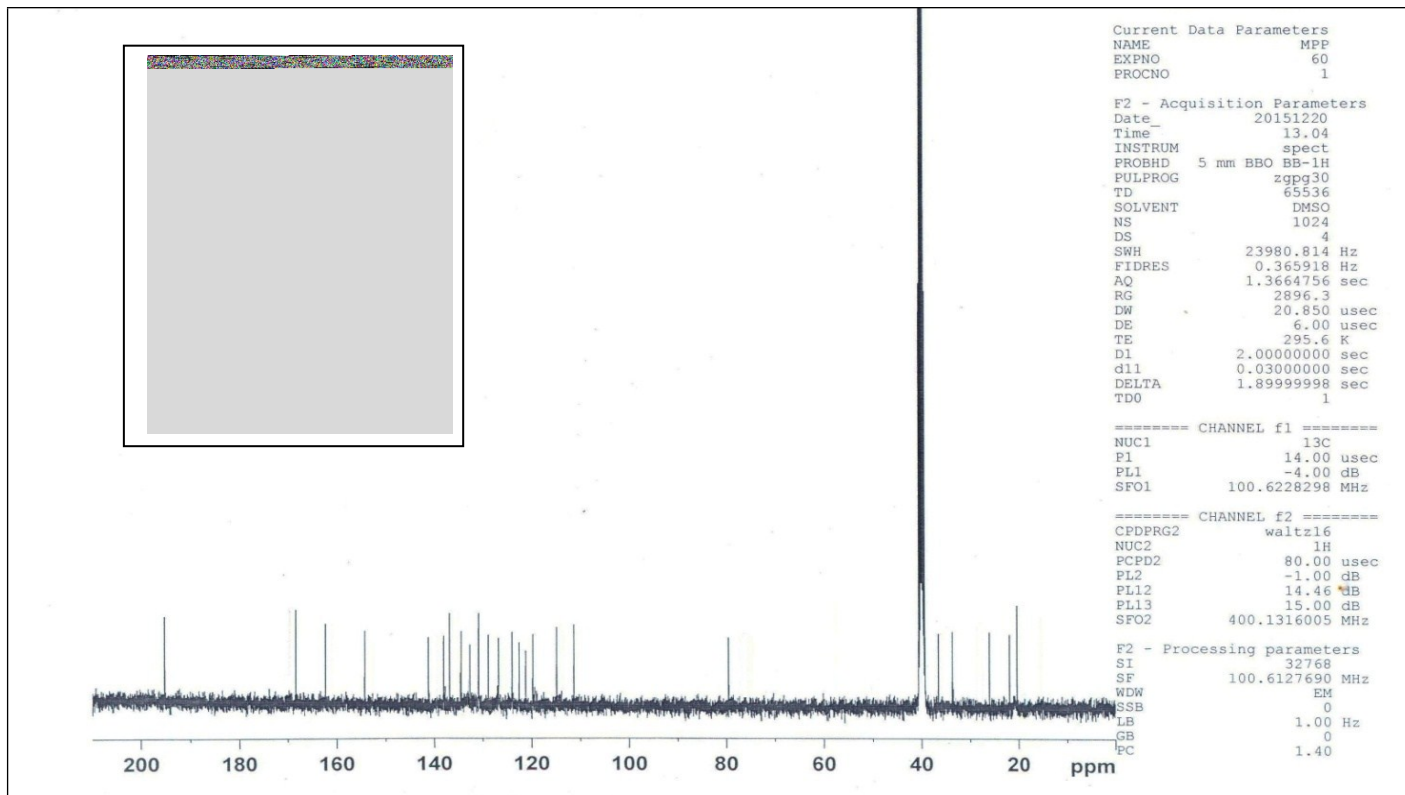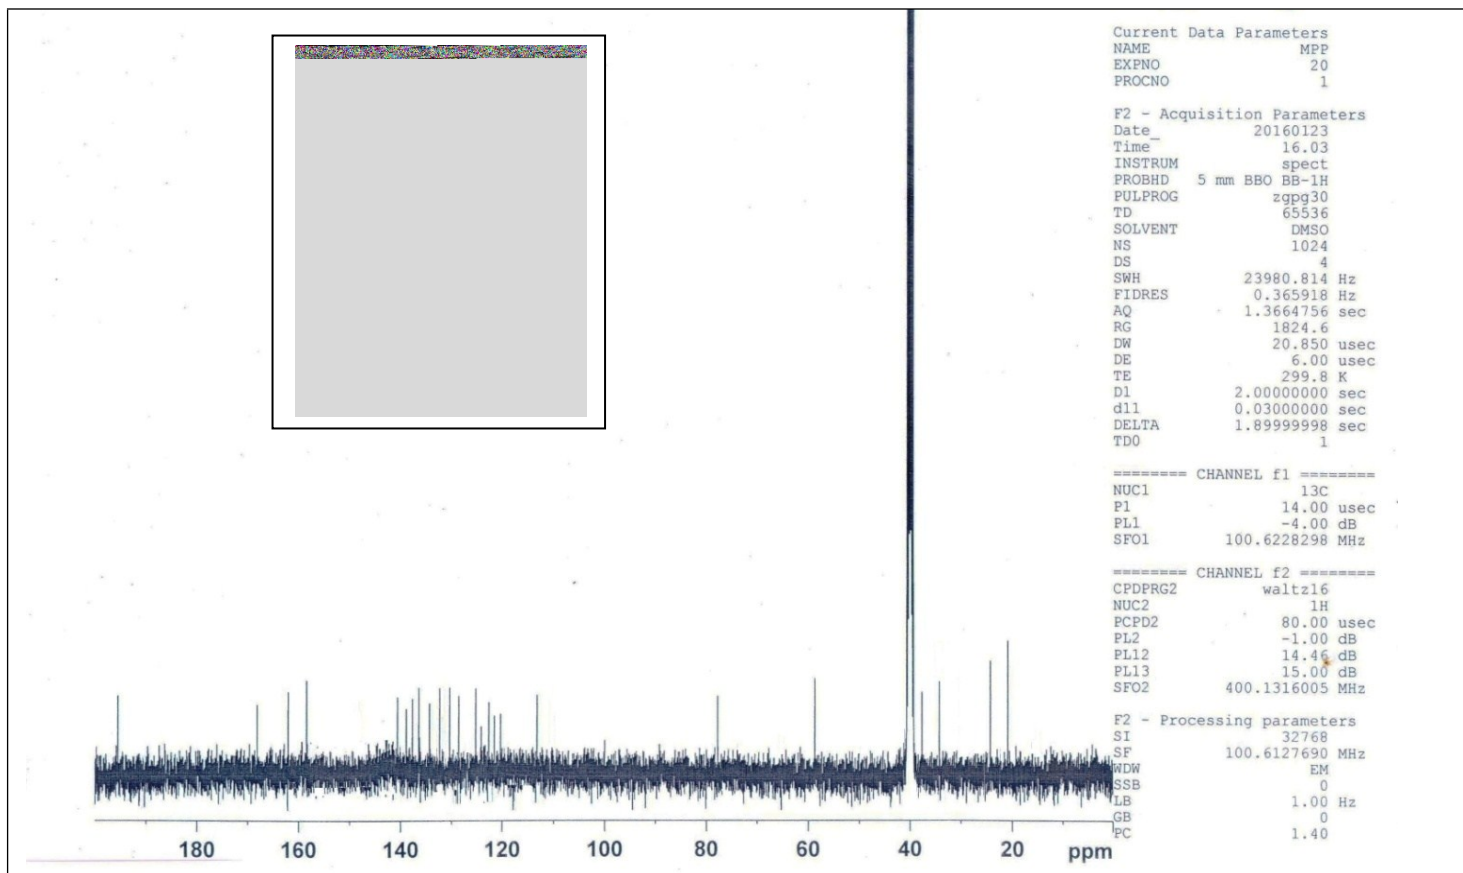

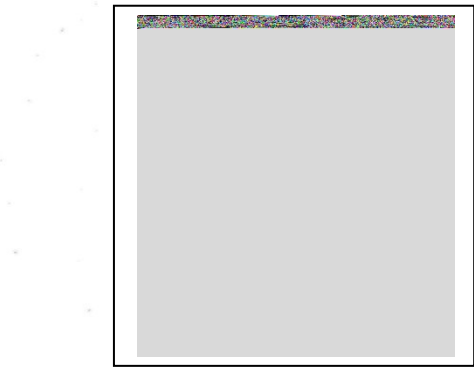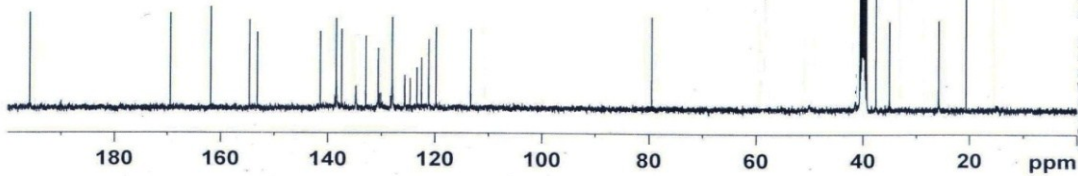

```
Current Data Parameters
NAME          MPP
EXPNO         32
PROCNO        1

F2 - Acquisition Parameters
Date_         20160111
Time          16.53
INSTRUM       spect
PROBHD        5 mm BBO BB-1H
PULPROG       zgpg30
TD            65536
SOLVENT       DMSO
NS            1024
DS            4
SWH           23980.814 Hz
FIDRES        0.365918 Hz
AQ            1.3664756 sec
RG            32768
DW            20.850 usec
DE            6.00 usec
TE            296.9 K
D1            2.00000000 sec
d11           0.03000000 sec
DELTA         1.89999998 sec
TD0           1

===== CHANNEL f1 =====
NUC1          13C
P1            14.00 usec
PL1           -4.00 dB
SFO1          100.6228298 MHz

===== CHANNEL f2 =====
CPDPRG2       waltz16
NUC2           1H
PCPD2         80.00 usec
PL2           -1.00 dB
PL12          14.46 dB
PL13          15.00 dB
SFO2          400.1316005 MHz

F2 - Processing parameters
SI            32768
SF            100.6127690 MHz
WDW           EM
SSB           0
LB            1.00 Hz
GB            0
PC            1.40
```

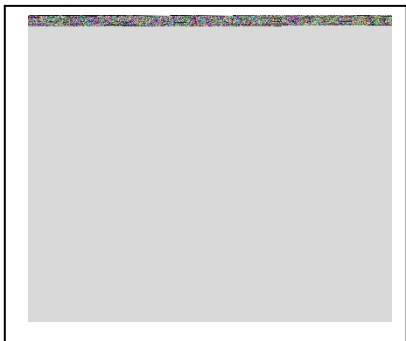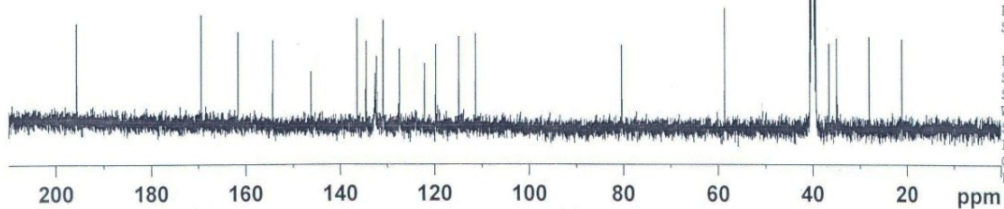

```
Current Data Parameters
NAME          MPP
EXPNO         64
PROCNO        1

F2 - Acquisition Parameters
Date_         20151221
Time          13.44
INSTRUM       spect
PROBHD        5 mm BBO BB-1H
PULPROG       zgpg30
TD            65536
SOLVENT       DMSO
NS            1024
DS            4
SWH           23980.814 Hz
FIDRES        0.365918 Hz
AQ            1.3664756 sec
RG            2896.3
DW            20.850 usec
DE            6.00 usec
TE            295.4 K
D1            2.00000000 sec
d11           0.03000000 sec
DELTA         1.89999998 sec
TD0           1

===== CHANNEL f1 =====
NUC1          13C
P1            14.00 usec
PL1           -4.00 dB
SFO1          100.6228298 MHz

===== CHANNEL f2 =====
CPDPRG2       waltz16
NUC2           1H
PCPD2         80.00 usec
PL2           -1.00 dB
PL12          14.46 dB
PL13          15.00 dB
SFO2          400.1316005 MHz

F2 - Processing parameters
SI            32768
SF            100.6127690 MHz
WDW           EM
SSB           0
LB            1.00 Hz
GB            0
PC            1.40
```

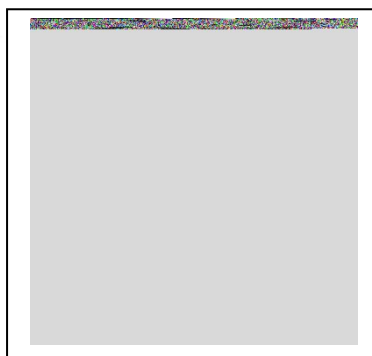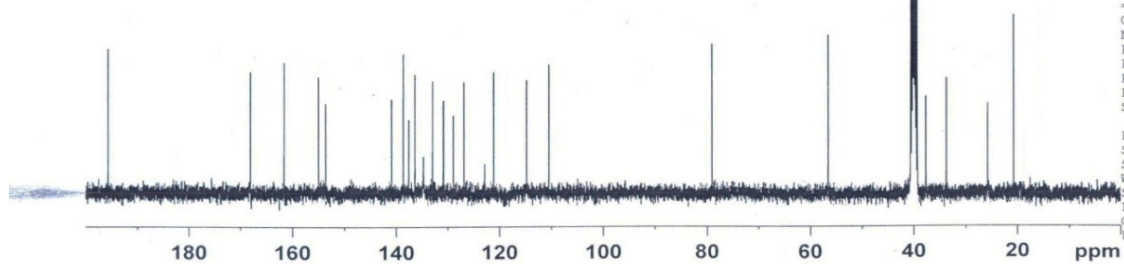

Current Data Parameters  
NAME MPP  
EXPNO 31  
PROCNO 1

F2 - Acquisition Parameters  
Date\_ 20160111  
Time 14.38  
INSTRUM spect  
PROBHD 5 mm BBO BB-1H  
PULPROG zgpg30  
TD 65536  
SOLVENT DMSO  
NS 1024  
DS 4  
SWH 23980.814 Hz  
FIDRES 0.365918 Hz  
AQ 1.3664756 sec  
RG 11585.2  
DW 20.850 usec  
DE 6.00 usec  
TE 296.7 K  
D1 2.00000000 sec  
d11 0.03000000 sec  
DELTA 1.89999998 sec  
TD0 1

===== CHANNEL f1 =====  
NUC1 13C  
P1 14.00 usec  
PL1 -4.00 dB  
SFO1 100.6228298 MHz

===== CHANNEL f2 =====  
CPDPRG2 waltz16  
NUC2 1H  
PCPD2 80.00 usec  
PL2 -1.00 dB  
PL12 14.46 dB  
PL13 15.00 dB  
SFO2 400.1316005 MHz

F2 - Processing parameters  
SI 32768  
SF 100.6127690 MHz  
WDW EM  
SSB 0  
LB 1.00 Hz  
GB 0  
PC 1.40

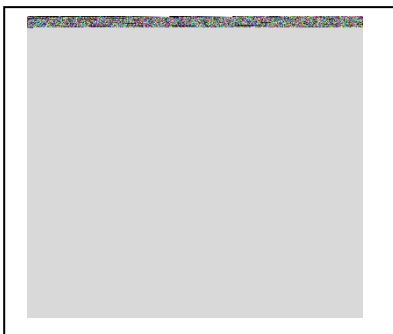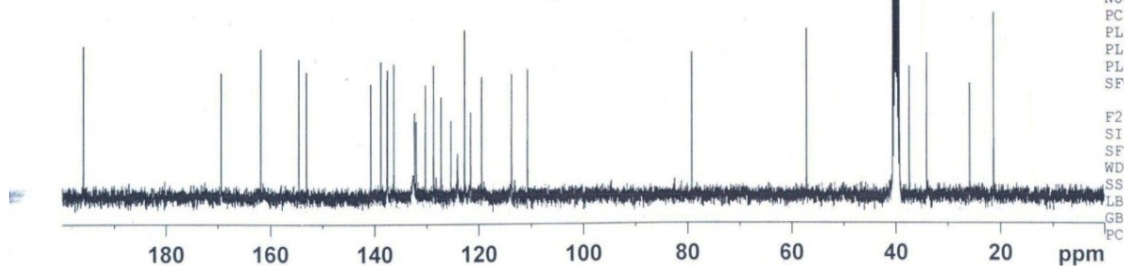

Current Data Parameters  
NAME MPP  
EXPNO 30  
PROCNO 1

F2 - Acquisition Parameters  
Date\_ 20160711  
Time 13.32  
INSTRUM spect  
PROBHD 5 mm BBO BB-1H  
PULPROG zgpg30  
TD 65536  
SOLVENT DMSO  
NS 1024  
DS 4  
SWH 23980.814 Hz  
FIDRES 0.365918 Hz  
AQ 1.3664756 sec  
RG 11585.2  
DW 20.850 usec  
DE 6.00 usec  
TE 296.6 K  
D1 2.00000000 sec  
d11 0.03000000 sec  
DELTA 1.89999998 sec  
TD0 1

===== CHANNEL f1 =====  
NUC1 13C  
P1 14.00 usec  
PL1 -4.00 dB  
SFO1 100.6228298 MHz

===== CHANNEL f2 =====  
CPDPRG2 waltz16  
NUC2 1H  
PCPD2 80.00 usec  
PL2 -1.00 dB  
PL12 14.46 dB  
PL13 15.00 dB  
SFO2 400.1316005 MHz

F2 - Processing parameters  
SI 32768  
SF 100.6127690 MHz  
WDW EM  
SSB 0  
LB 1.00 Hz  
GB 0  
PC 1.40

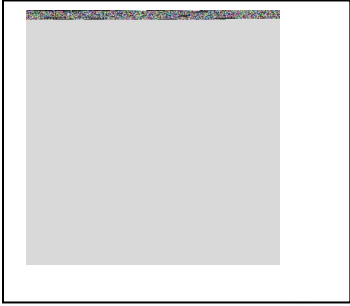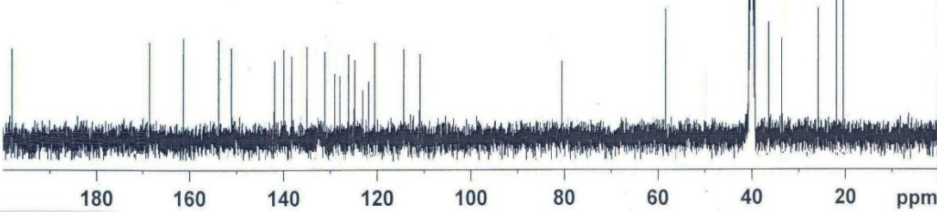

```
Current Data Parameters
NAME          MPP
EXPNO         27
PROCNO        1

F2 - Acquisition Parameters
Date_         20160108
Time          16.57
INSTRUM       spect
PROBHD        5 mm BBO BB-1H
PULPROG       zgpg30
TD            65536
SOLVENT       DMSO
NS            1024
DS            4
SWH           23980.814 Hz
FIDRES        0.365918 Hz
AQ            1.3664756 sec
RG            18390.4
DW            20.850 usec
DE            6.00 usec
TE            297.0 K
D1            2.00000000 sec
d11           0.03000000 sec
DELTA         1.89999998 sec
TD0           1

===== CHANNEL f1 =====
NUC1          13C
P1            14.00 usec
PL1           -4.00 dB
SF01          100.6228298 MHz

===== CHANNEL f2 =====
CPDPRG2       waltz16
NUC2           1H
PCPD2         80.00 usec
PL2           -1.00 dB
PL12          14.46 dB
PL13          15.00 dB
SF02          400.1316005 MHz

F2 - Processing parameters
SI            32768
SF            100.6127690 MHz
WDW           EM
SSB           0
LB            1.00 Hz
GB            0
PC            1.40
```

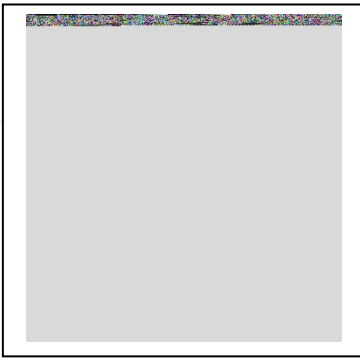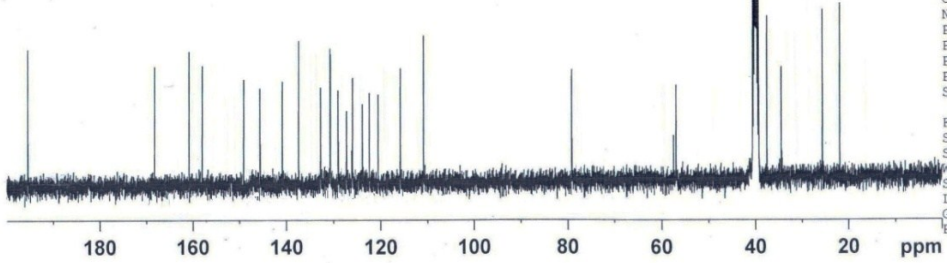

```
Current Data Parameters
NAME          MPP
EXPNO         26
PROCNO        1

F2 - Acquisition Parameters
Date_         20160108
Time          15.22
INSTRUM       spect
PROBHD        5 mm BBO BB-1H
PULPROG       zgpg30
TD            65536
SOLVENT       DMSO
NS            1024
DS            4
SWH           23980.814 Hz
FIDRES        0.365918 Hz
AQ            1.3664756 sec
RG            4597.6
DW            20.850 usec
DE            6.00 usec
TE            296.7 K
D1            2.00000000 sec
d11           0.03000000 sec
DELTA         1.89999998 sec
TD0           1

===== CHANNEL f1 =====
NUC1          13C
P1            14.00 usec
PL1           -4.00 dB
SF01          100.6228298 MHz

===== CHANNEL f2 =====
CPDPRG2       waltz16
NUC2           1H
PCPD2         80.00 usec
PL2           -1.00 dB
PL12          14.46 dB
PL13          15.00 dB
SF02          400.1316005 MHz

F2 - Processing parameters
SI            32768
SF            100.6127690 MHz
WDW           EM
SSB           0
LB            1.00 Hz
GB            0
PC            1.40
```

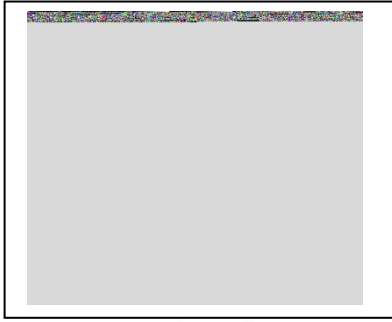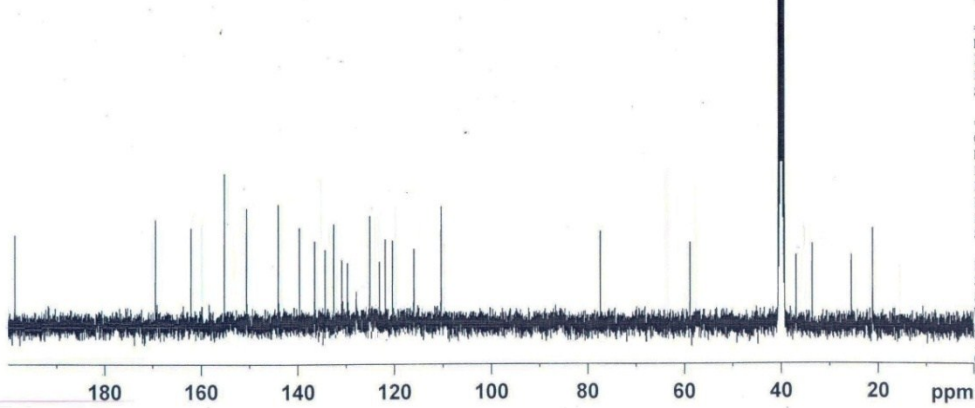

Current Data Parameters  
NAME MPP  
EXPNO 28  
PROCNO 1

F2 - Acquisition Parameters  
Date\_ 20160111  
Time 12.08  
INSTRUM spect  
PROBHD 5 mm BBO BB-1H  
PULPROG zgpg30  
TD 65536  
SOLVENT DMSO  
NS 914  
DS 4  
SWH 23980.814 Hz  
FIDRES 0.365918 Hz  
AQ 1.3664756 sec  
RG 11585.2  
DW 20.850 usec  
DE 6.00 usec  
TE 296.1 K  
D1 2.0000000 sec  
d11 0.0300000 sec  
DELTA 1.89999998 sec  
TD0 1

----- CHANNEL f1 -----  
NUC1 13C  
P1 14.00 usec  
PL1 -4.00 dB  
SFO1 100.6228298 MHz

----- CHANNEL f2 -----  
CPDPRG2 waltz16  
NUC2 1H  
PCPD2 80.00 usec  
PL2 -1.00 dB  
PL12 14.46 dB  
PL13 15.00 dB  
SFO2 400.1316005 MHz

F2 - Processing parameters  
SI 32768  
SF 100.6127690 MHz  
WDW EM  
SSB 0  
LB 1.00 Hz  
GB 0  
PC 1.40

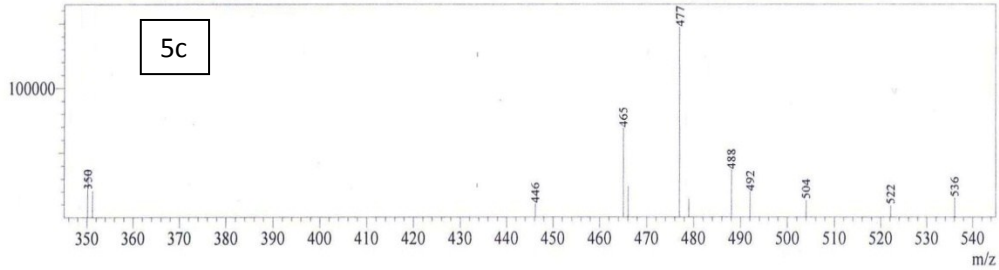

MS Spectrum

Line#:1 R.Time:----(Scan#:----)

MassPeaks:12

Spectrum Mode:Averaged 3.933-5.133(237-309) Base Peak:477(164790)

BG Mode:Averaged 4.867-5.183(293-312) Segment 1 - Event 1

| Sr. No. | m/z    | Absolute Intensity | Relative Intensity |
|---------|--------|--------------------|--------------------|
| 1       | 350.10 | 21926              | 13.31              |
| 2       | 351.20 | 21272              | 12.91              |
| 3       | 446.15 | 10538              | 6.39               |
| 4       | 465.05 | 68879              | 41.80              |
| 5       | 466.05 | 23933              | 14.52              |
| 6       | 477.05 | 164790             | 100.00             |
| 7       | 479.00 | 14166              | 8.60               |
| 8       | 488.05 | 36563              | 22.19              |
| 9       | 492.05 | 19828              | 12.03              |
| 10      | 504.00 | 13330              | 8.09               |
| 11      | 522.15 | 9201               | 5.58               |
| 12      | 536.05 | 14970              | 9.08               |

Processed by: [unreadable] Date: [unreadable]



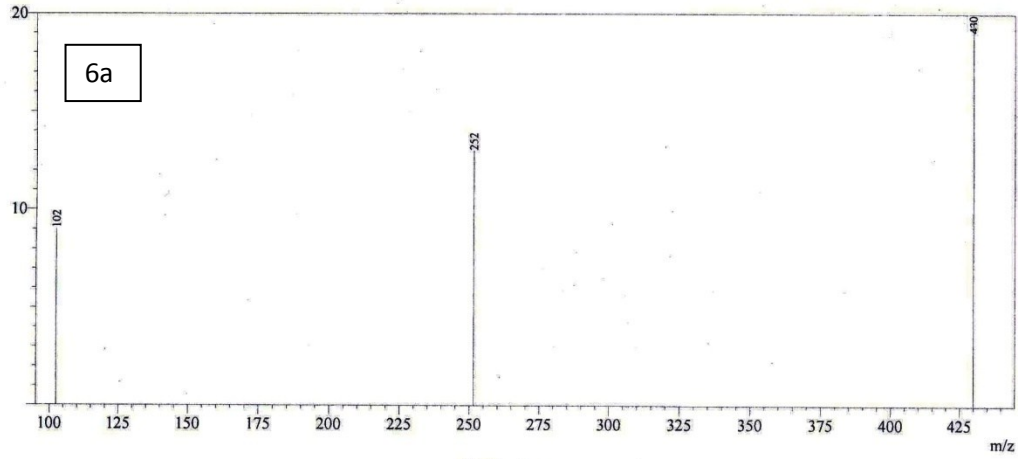

MS Spectrum

Line#:1 R.Time:----(Scan#:----)  
 MassPeaks:3  
 Spectrum Mode:Averaged 0.317-1.533(20-93) Base Peak:430(20)  
 BG Mode:None Segment 1 - Event 1  
 Precursor Ion Scan:m/z 430.03

| Sr. No. | m/z    | Absolute Intensity | Relative Intensity |
|---------|--------|--------------------|--------------------|
| 1       | 102.40 | 9                  | 45.00              |
| 2       | 251.50 | 13                 | 65.00              |
| 3       | 430.03 | 20                 | 100.00             |

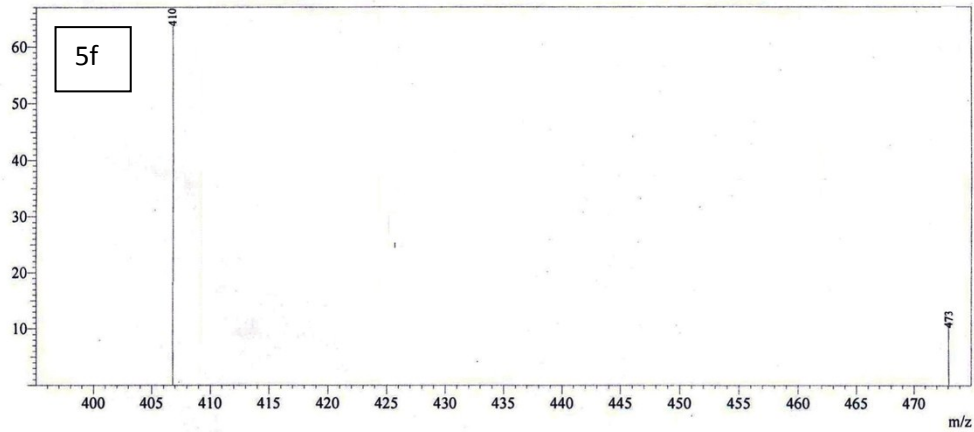

MS Spectrum

Line#:1 R.Time:----(Scan#:----)  
 MassPeaks:2  
 Spectrum Mode:Averaged 0.183-1.733(12-105) Base Peak:410(67)  
 BG Mode:None Segment 1 - Event 1  
 Precursor Ion Scan:m/z 410.10

| Sr. No. | m/z    | Absolute Intensity | Relative Intensity |
|---------|--------|--------------------|--------------------|
| 1       | 410.10 | 67                 | 100.00             |
| 2       | 473.10 | 10                 | 14.93              |

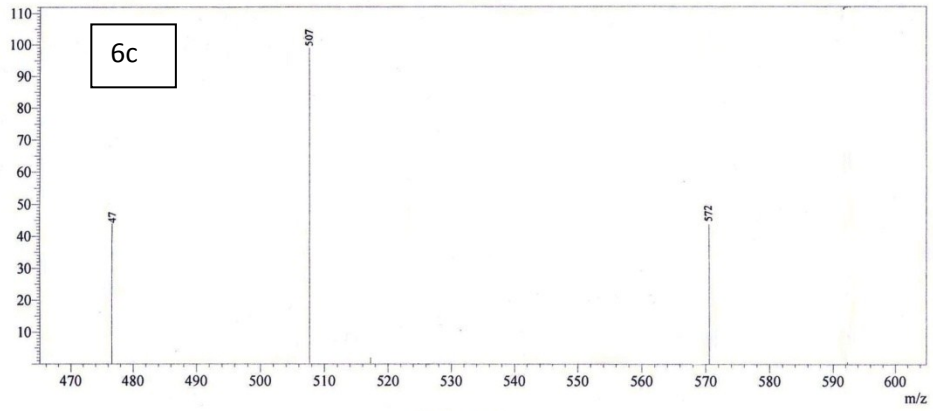

MS Spectrum

Line#:1 R.Time:---(Scan#:---)  
 MassPeaks:3  
 Spectrum Mode:Averaged 0.050-0.967(4-59) Base Peak:507(112)  
 BG Mode:None Segment 1 - Event 1  
 Precursor Ion Scan:m/z 507.30

| Sr. No. | m/z    | Absolute Intensity | Relative Intensity |
|---------|--------|--------------------|--------------------|
| 1       | 476.60 | 44                 | 39.29              |
| 2       | 507.30 | 112                | 100.00             |
| 3       | 572.30 | 44                 | 39.29              |

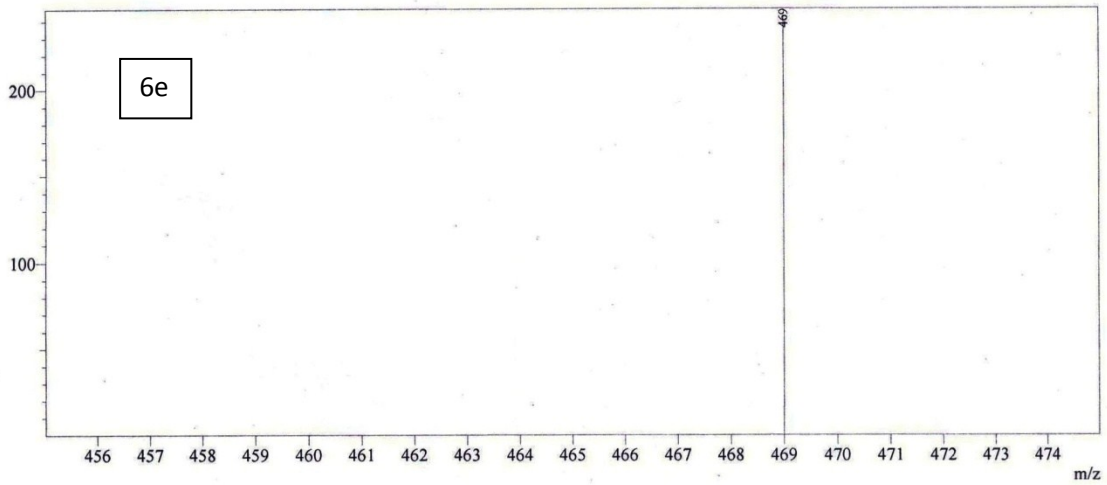

MS Spectrum

Line#:1 R.Time:---(Scan#:---)  
 MassPeaks:1  
 Spectrum Mode:Averaged 0.700-0.817(43-50) Base Peak:469(247)  
 BG Mode:None Segment 1 - Event 1  
 Precursor Ion Scan:m/z 469.40

| Sr. No. | m/z    | Absolute Intensity | Relative Intensity |
|---------|--------|--------------------|--------------------|
| 1       | 469.40 | 247                | 100.00             |

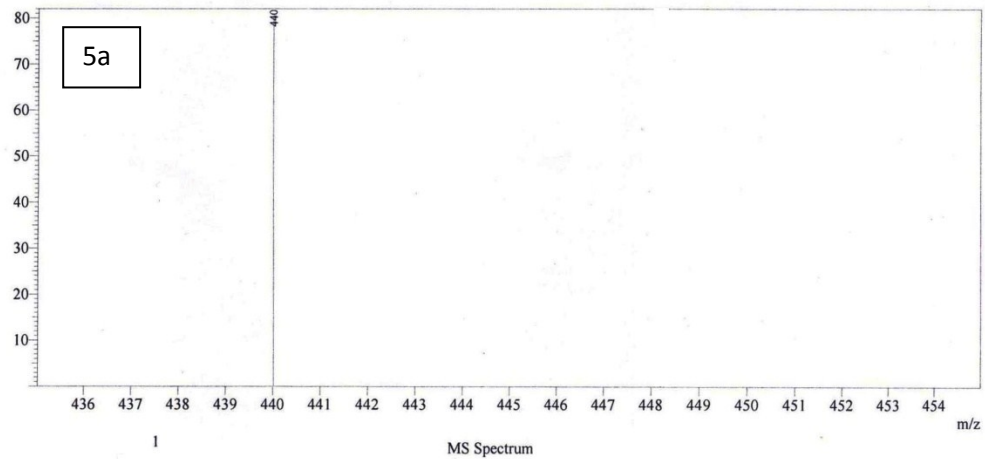

Line#: 1 R. Time: ----(Scan#: ----)  
 MassPeaks: 1  
 Spectrum Mode: Averaged 0.933-1.117(57-68) Base Peak: 440(82)  
 BG Mode: None Segment 1 - Event 1  
 Precursor Ion Scan: m/z 440.01

| Sr. No. | m/z    | Absolute Intensity | Relative Intensity |
|---------|--------|--------------------|--------------------|
| 1       | 440.01 | 82                 | 100.00             |
